# Supplementary material
Source: publisher figshare collection journal article supplement (https://gsajournals.figshare.com/ndownloader/files/12802736)
Supplement: Supplementary file 1 [file 12802736]

**Table S5 Genome comparison among *M. vittatus*, *M. sculpturatus*, and *M. pulmonis***

| Features | *M. vittatus* | *M. sculpturatus* | *M. pulmonis* |
| --- | --- | --- | --- |
| Accession No. | SAMN07809904 | NW_019384690.1 | NC_002771.1 |
| Genome size(bp) | 683,827 | 494,538 | 963,879 |
| Gene number | 1,041 | 485 | 790 |
| Protein-coding genes (excluding pseudogenes) | 1,010 | 458 | 745 |
| Gene length (bp) | 607,417 | 462,265 | 873,258 |
| GC content | 42.70% | 45.80% | 26.60% |
| GC content in gene region | 43.28% | 46.53% | 28.76% |
| Gene/Genome (%) | 88.83% | 93.47% | 90.60% |
| Gene average length (bp) | 583 | 953 | 1115 |
| Intergenic region length (bp) | 76,410 | 32,273 | 90,621 |
| GC content in intergenic region |  |  |  |
| Intergenic length/Genome (%) | 11.17% | 6.53% | 9.40% |
| Pseudogenes | 0 | 0 | 9 |
| tRNA number | 29 | 27 | 29 |
| tRNA average length (bp) | 78 | 78 | 78 |
| rRNA (by de novo prediction) | 2 | 2 | 2 |
